# Supplementary material for: Metal–organic cage incorporating thin-film nanocomposite membranes with antifouling properties
Source: Royal Society of Chemistry journal article supplement (doi:10.1039/d2cc01032a), 2022-01-01
Supplement: d2cc01032a1.pdf [file d2cc01032a1.pdf]

## Electronic Supplementary Information

# **Metal-Organic Cage Incorporating Thin-Film Nanocomposite Membranes with Antifouling Properties**

*Yi Di Yuan, Xiaomei Zhang,<sup>†</sup> Ziqi Yang and Dan Zhao\**

Department of Chemical & Biomolecular Engineering, National University of Singapore,  
117585 Singapore

<sup>†</sup>Institute of Agricultural Facilities and Equipment, Jiangsu Academy of Agricultural Sciences,  
Nanjing 210014, China

## Materials and Methods

**Materials and Chemicals.** All chemicals were obtained from commercial suppliers and used without further purification. Polyethersulfone (PES) ultrafiltration (UF) membrane (UE005, RisingSun Membrane, Beijing, China) was used as the backing substrate to prepare thin-film nanocomposite membranes. *m*-Phenylenediamine (MPD, > 99%), trimesoyl chloride (TMC, 98%), titanium (IV) chloride (TiCl<sub>4</sub>, 1.0 M in toluene), titanium (IV) oxide (Aeroxide, nanopowder, 21 nm primary particle size (TEM), ≥ 99.5% trace metals basis), bovine serum albumin (BSA), and albumin-fluorescein isothiocyanate conjugate (BSA-FITC) were obtained from Sigma-Aldrich. Zirconocene dichloride (Cp<sub>2</sub>ZrCl<sub>2</sub>, > 99%) and pamoic acid (97%) were obtained from Aladdin. Dodecyltrimethylammonium bromide (DTAB, > 98%) and 2-aminoterephthalic acid (> 98%) were obtained from TCI. *N,N*-dimethylformamide (DMF, 99%), *N,N*-diethylformamide (DEF, 99%), and dichloromethane (DCM, 99%) were obtained from VWR. *n*-Hexane (> 99%) and sodium chloride (NaCl, > 99.5%) were obtained from Merck Millipore. A Milli-Q unit (Millipore, USA) was used to supply deionized water.

## Experimental Methods

**Synthesis of ZrT-1-NH<sub>2</sub>.** ZrT-1-NH<sub>2</sub> was synthesized based on the previously reported method.<sup>1</sup> Zirconocene dichloride (0.3 g, 1.0 mmol) and 2-aminoterephthalic (0.1 g, 0.6 mmol) were added to DEF (10 mL) with deionised water (2 mL). The mixture was briefly sonicated and heated at 65 °C for at least 3 hours. Yellow cubic crystals formed on the vial walls. The products were washed with DMF and exchanged with DCM for two days.

**Synthesis of Ti<sub>4</sub>L<sub>6</sub>-MOC.** Ti<sub>4</sub>L<sub>6</sub>-MOC was synthesized based on the previously reported method.<sup>2</sup> Pamoic acid (0.038g, 0.098 mmol) was first dispersed thoroughly in 6 mL of *n*-propanol/DMF (v/v = 3:1) before titanium (IV) chloride (90 µL, 0.4 mmol) and 2 drops of ethylenediamine were added to give orange suspension. The suspension was heated at 100 °C

for at least 1 day until red crystals were obtained. The crystals were washed with hot *n*-propanol/DMF (3:1 v/v) until no orange residues were observed.

**Preparation of Thin-Film Composite Membranes.** The PA layer was prepared using the interfacial polymerization method on a PES UF substrate. The substrate was first mounted on a frame, and the PES side was exposed to 2 w/v% MPD in 3:2 acetone/water for 2 minutes. The MPD solution was then poured away. Excess MPD solution was removed by drying the coupon between two pieces of filter paper with a rubber roller. The coupon was then remounted on the frame and exposed to 0.15 w/v% TMC in *n*-hexane for 1 minute. The TMC solution was decanted, and the nascent membrane was washed with fresh *n*-hexane to quench further reactions. The membrane was dried for about 30 s before being briefly washed with running DI water and stored in 4 °C DI water overnight before use.

**Preparation of Thin-Film Nanocomposite Membranes Containing MOCs.**  $\text{Ti}_4\text{L}_6$ -MOC- and ZrT-1-NH<sub>2</sub>-incorporated TFN membranes were prepared similarly. Previously, it has been found that it is necessary to completely dissolve the MOC in the aqueous solution, which requires adding a substantial amount of polar organic solvents such as acetone or methanol.<sup>3,4</sup> Similarly, the dissolution of  $\text{Ti}_4\text{L}_6$ -MOC can be sped up by adding acetone. Therefore, the MOCs were processed in acetone/water (v/v = 3:2).  $\text{Ti}_4\text{L}_6$ -MOC or ZrT-1-NH<sub>2</sub> of various concentrations were added to the MPD solutions and applied to the PES UF substrates to deposit the cages on the surface of the substrate. TFN membranes are named as 0.0x-TFN-Ti (for membranes containing  $\text{Ti}_4\text{L}_6$ -MOC) and 0.0x-TFN-Zr (for membranes containing ZrT-1-NH<sub>2</sub>); 0.0x is the weight percentage of MOCs in the MPD solution. The membranes were denoted as 0.02-TFN and so on, corresponding to the initial w/v% of MOC in MPD solution. For example, the 0.06-TFN-Ti membrane was fabricated by exposing the PES membrane to an MPD solution containing 3 mg of  $\text{Ti}_4\text{L}_6$ -MOC per 5 mL of MPD solution.

**Membrane Separation Test.** The water permeability and salt rejection of the TFC and ZrT-1-NH<sub>2</sub> TFN membranes were measured with a dead-end reverse osmosis filtration setup at room temperature. The feedwater near to membrane surface was stirred at 450 rpm to minimize concentration polarization. A membrane of an effective area of 1.77 cm<sup>2</sup> was compacted at 15.5 bars with 2000 ppm sodium chloride (NaCl) solution for 30 minutes until the permeate flux became stable. The membrane water flux ( $J_w$ ) was calculated by normalizing the volume of permeate ( $V$ ) by the effective surface area of membrane ( $A$ ) in contact with feedwater and the collection duration ( $\Delta t$ ):

$$J_w = \frac{V}{A \times \Delta t} \quad \text{Eq. (1)}$$

The salt rejection is calculated by:

$$R = \left( 1 - \frac{C_p}{C_f} \right) \times 100\% \quad \text{Eq. (2)}$$

where  $C_p$  and  $C_f$  are conductivities of permeate and feed solutions, respectively, and were obtained from conductivity measurements.

**Membrane Fouling Test.** Dynamic membrane fouling was conducted with bovine serum albumin (BSA) as the model protein and dodecyltrimethyl ammonium bromide (DTAB) as the positively charged fouling model. Briefly, a membrane was first compacted with 2000 ppm NaCl solution at a transmembrane pressure of 16 bars for 30 min before recording the initial water flux. The feedwater was then changed to feed containing foulants. The concentrations of foulants are 200 ppm for BSA and 10 ppm for DTAB. NaCl (2000 ppm) was added to the foulant solution to check if any salt-permeating defects formed on the membrane during the test. Considering the effect of foulant retention, resistance by cake formation would be significant and pronounced in a more permeable membrane.<sup>5-7</sup> This would result in an underestimation of the antifouling capability. Therefore, we determined the fouling rate by tracing the membrane permeability as a function of the volume of permeates collected. The

foulant test was conducted until about 6 mL of permeate was collected for BSA and about 3 mL of permeate for DTAB fouling due to the significant fouling that drastically reduced permeance. After fouling, the system was flushed with 300 mL of pure water. The membrane was further washed in pure water for 10 min with 1000 rpm stirring and 300 mL pure water flushing. During this process, loosely bound foulants were removed. The cleaned membrane was then tested with 2000 ppm NaCl feed to quantify the antifouling capabilities of the membrane by calculating the flux recovery ratio (FRR) and retention ratio (RR). FRR is given by  $f_c/f_i$  and RR is given by  $f_f/f_i$ , ( $f_i$  is the initial flux,  $f_f$  is the flux after fouling duration, and  $f_c$  is the water flux after membrane cleaning).

**Static Membrane Fouling Test.** To ensure the vitality of BSA, the BSA-FITC was dissolved in phosphate buffer solution at pH 6.4. Considering the common environments of working RO membranes, membrane fouling was conducted in dark environments. Bovine serum albumin-fluorescein isothiocyanate conjugate (BSA-FITC, 0.5 mg/mL) was dissolved in phosphate buffer saline (PBS) containing 0.137 M NaCl, 2.7 mM KCl, 10 mM Na<sub>2</sub>HPO<sub>4</sub>, and 1.8 mM KH<sub>2</sub>PO<sub>4</sub>, and adjusted to pH 6.4 with 0.5 M NaOH and 0.5 M HCl. BSA-FITC solution was stored at 4 °C until use. Wet membranes were dried with filter paper before being fixed onto a frame that exposed only the PA side. The membranes were exposed to BSA-FITC solution (0.5 mL) for 2.5 h in the dark. Fouled membranes were then washed thoroughly with flowing deionized water to remove loosely attached BSA-FITC and air-dried for subsequent observation under a fluorescence microscope using the FITC channel. At this emission wavelength, the green BSA-FITC signal is undisturbed by the blue fluorescence of ZrT-1-NH<sub>2</sub>. For consistency, the center of the membranes was compared.

**General Characterizations.** Characterizations of MOCs were conducted directly without further modification, while membranes may be first treated with DCM to isolate the polyamide layers for characterizations. Surface and cross-section morphology of membranes was

observed with field-emission scanning electron microscopy (FE-SEM) and atomic force microscopy (AFM). FE-SEM was conducted on a JEOL JSM-7610F scanning electron microscope. Each sample was treated with platinum sputtering before observation. AFM was conducted on Bruker Dimension ICON with Nanoscope V controller using tapping mode. The AFM data were processed with Nanoscope 9.7 and NanoScope Analysis 2.0. The elemental compositions in the membranes were probed with Fourier transform infrared spectrum (FT-IR) and energy dispersive X-ray spectrometry (XPS). FT-IR was measured using an attenuated total internal reflectance Fourier transform infrared spectrometer (ATR-FTIR, Alfa, Bruker), collecting absorption spectra from 400 to 4000  $\text{cm}^{-1}$  and averaged over 32 scans. XPS was analyzed using X-ray photoelectron spectroscopy (XPS, AXIS Ultra DLD, Kratos X-ray photoelectron spectrometer, monochromatic Al  $K\alpha$  radiation (1486.71 eV) at 15 kV). Ultraviolet-visible spectrometry (UV-Vis) and confocal laser fluorescence microscopy (CLM) were conducted to identify MOCs in membranes. Liquid UV-Vis spectra were collected on a Shimadzu UV-3600 spectrometer. The solid-state UV-Vis spectra were obtained with a Shimadzu UV-2450 spectrophotometer using  $\text{BaSO}_4$  as the standard. CLM was conducted with a Nikon A1plus camera and Ti microscope. The polyamide layers of the membranes were viewed under UV (402 nm) or FITC (488 nm) laser channels through an Apo 20x  $\lambda$ S DIC N2 objective lens. The setting of both channels was kept the same to reflect the actual intensities. Confocal images were acquired with the NIS-Elements C package. Fluorescence microscopy images were acquired with a Nikon Ti-U fluorescence microscope at 50% intensity and NIS-Elements D. The membrane surface charge was analyzed with SurPASS electrokinetic analyzer (Anton Paar GmbH) with 0.01 M NaCl. The zetapotential of MOCs was analyzed with Malvern Zetasizer (Malvern Instruments, UK). Thermogravimetric analyses (TGA) were conducted using a Shimadzu DTG-60AH with an airflow rate of 50 mL/min. The samples were heated from 25 °C to 700 °C at a rate of 10 °C/min. Nitrogen gas sorption tests were conducted at 77

K using the freshly synthesized  $\text{Ti}_4\text{L}_6$ -MOC activated at 80 °C under vacuum for 8 h on a Quantachrome Autosorb iQ3 surface area and pore size analyzer. Powder X-ray diffraction patterns were obtained on a Rigaku MiniFlex 600 X-ray powder diffractometer equipped with a Cu sealed tube ( $\lambda = 1.5418 \text{ \AA}$ ) operating at 40 kV, 15 mA, with a scan rate of  $2 \text{ deg min}^{-1}$ . Contact angle measurements were conducted on a telescopic goniometer (Rame–Hart, Model 100–00–(230)).

**Pre-Treatment of Membrane Substrates.** Dry PES UF substrate was cut into suitable sized coupons and soaked in isopropyl alcohol (IPA) for 1 h before soaking and washing thoroughly with aliquots of cold deionized water until IPA was mostly removed. The IPA-treated coupons were then stored in cold deionized water at 4 °C overnight before exchanging with fresh cold deionized water. This was repeated one more time to ensure that most IPA had been removed. The PES UF coupons were stored in cold deionized water at 4 °C until use.

**Isolation of Polyamide (PA) Layer for Characterizations.** The fresh membrane was dried under a vacuum at 55 °C overnight. The dried membrane was soaked in dichloromethane until the PA layer detached from the substrate. The PA layer was collected and washed with fresh aliquots of dichloromethane until no white residues were observed. The samples were placed at 25 °C under vacuum for at least 1 h to remove residual dichloromethane.

**Thermogravimetric Analyses (TGA) of MOCs and Membranes.** TGA tests under an oxidative atmosphere (e.g., air) can burn away the organic portion of the membrane and MOCs, leaving zirconium oxide or titanium oxide, depending on the type of MOCs. This will estimate the loading of MOCs in the PA layer. The samples were heated from room temperature to 700 °C in air at a heating rate of 10 °C/min. The content of MOCs was calculated using the following equation with  $\text{ZrT-1-NH}_2$  as an example:

$$Zr \text{ wt}\% = \frac{\left(\frac{m_r}{m_t}\right)_{TFN} - \left(\frac{m_r}{m_t}\right)_{TFC}}{\left(\frac{m_r}{m_t}\right)_{ZrT-1-NH_2}} \times 100\% \quad \text{Eq. (3)}$$

where  $m_t$  and  $m_r$  refer to the total mass of sample loaded initially and the residual mass after burning, respectively.

**Gas Sorption Tests.** Freshly synthesized  $Ti_4L_6$ -MOC in 1-propanol/dimethylformamide (v/v = 3:1) was exchanged with DCM over two days. Excess DCM was poured away, and the sample was activated at 80 °C under a vacuum for 8 h.



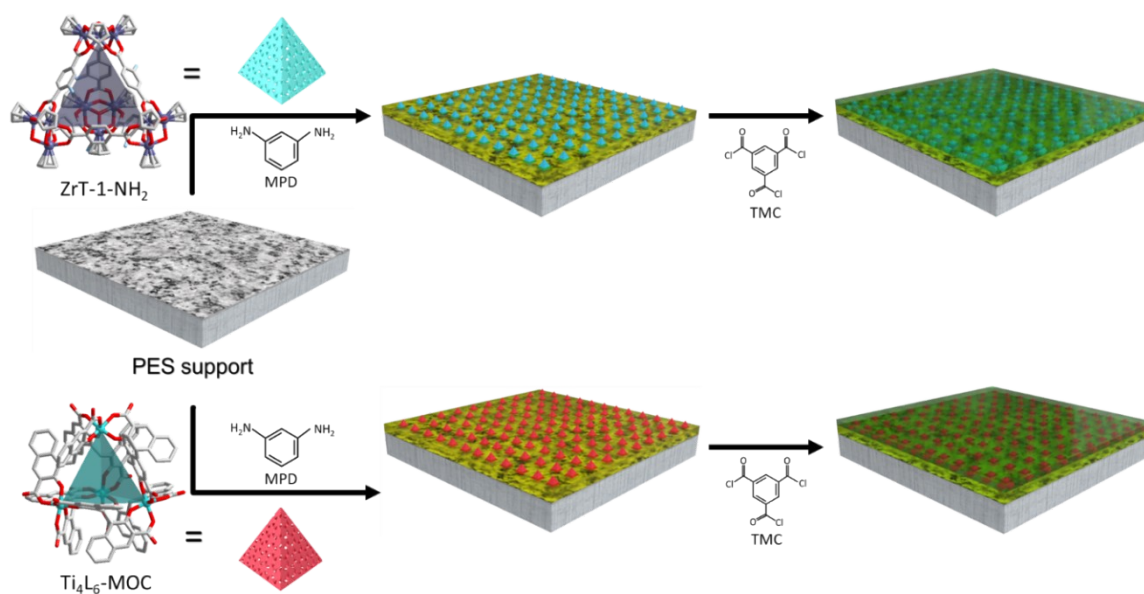

**Supplementary Figure S1.** Scheme of TFN-Zr and TFN-Ti membrane fabrication. Color code of ZrT-1-NH<sub>2</sub> and Ti<sub>4</sub>L<sub>6</sub>-MOC: purple: Zr, green: Ti, red: O, light blue: N, grey: C, purple polyhedral: space within ZrT-1-NH<sub>2</sub>, green polyhedra: space within Ti<sub>4</sub>L<sub>6</sub>-MOC.

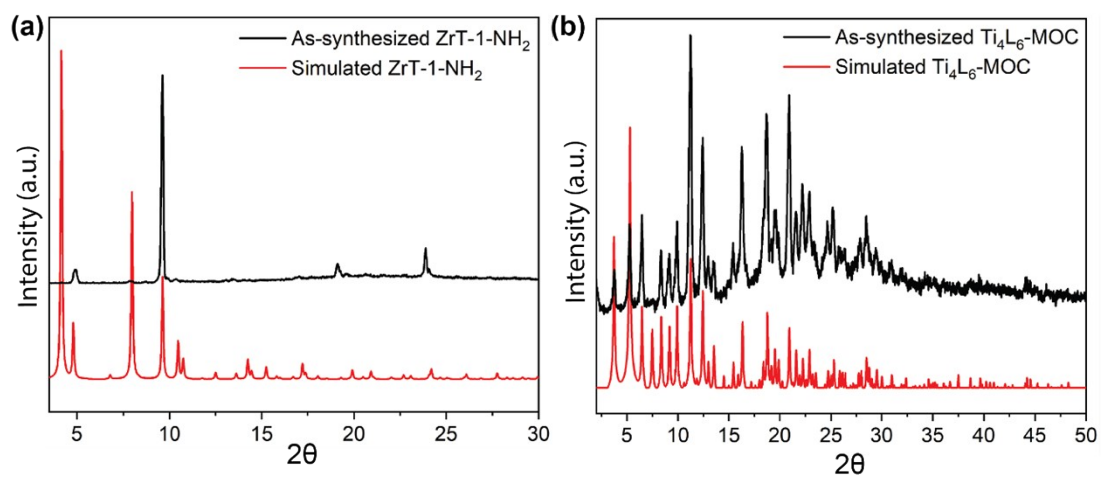

**Supplementary Figure S2.** PXRD spectra of ZrT-1-NH<sub>2</sub> (a) and Ti<sub>4</sub>L<sub>6</sub>-MOC (b).

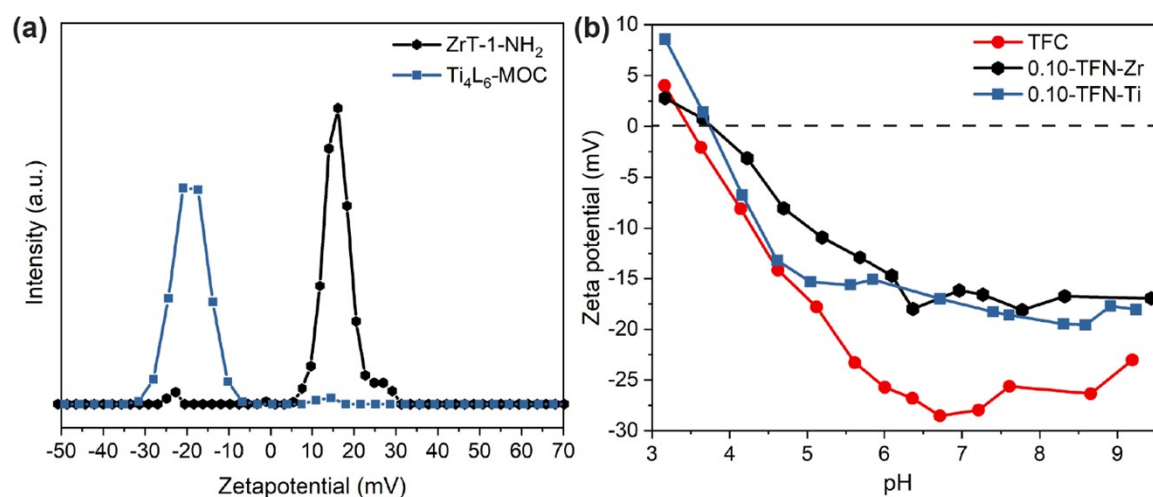

**Supplementary Figure S3.** (a) Zeta potential of Ti<sub>4</sub>L<sub>6</sub>-MOC and ZrT-1-NH<sub>2</sub> in acetone/water (3:2 v/v). (b) Zeta potential of TFC, 0.10-TFN-Zr, and 0.10-TFN-Ti under various pH values in 0.01 M NaCl solution.

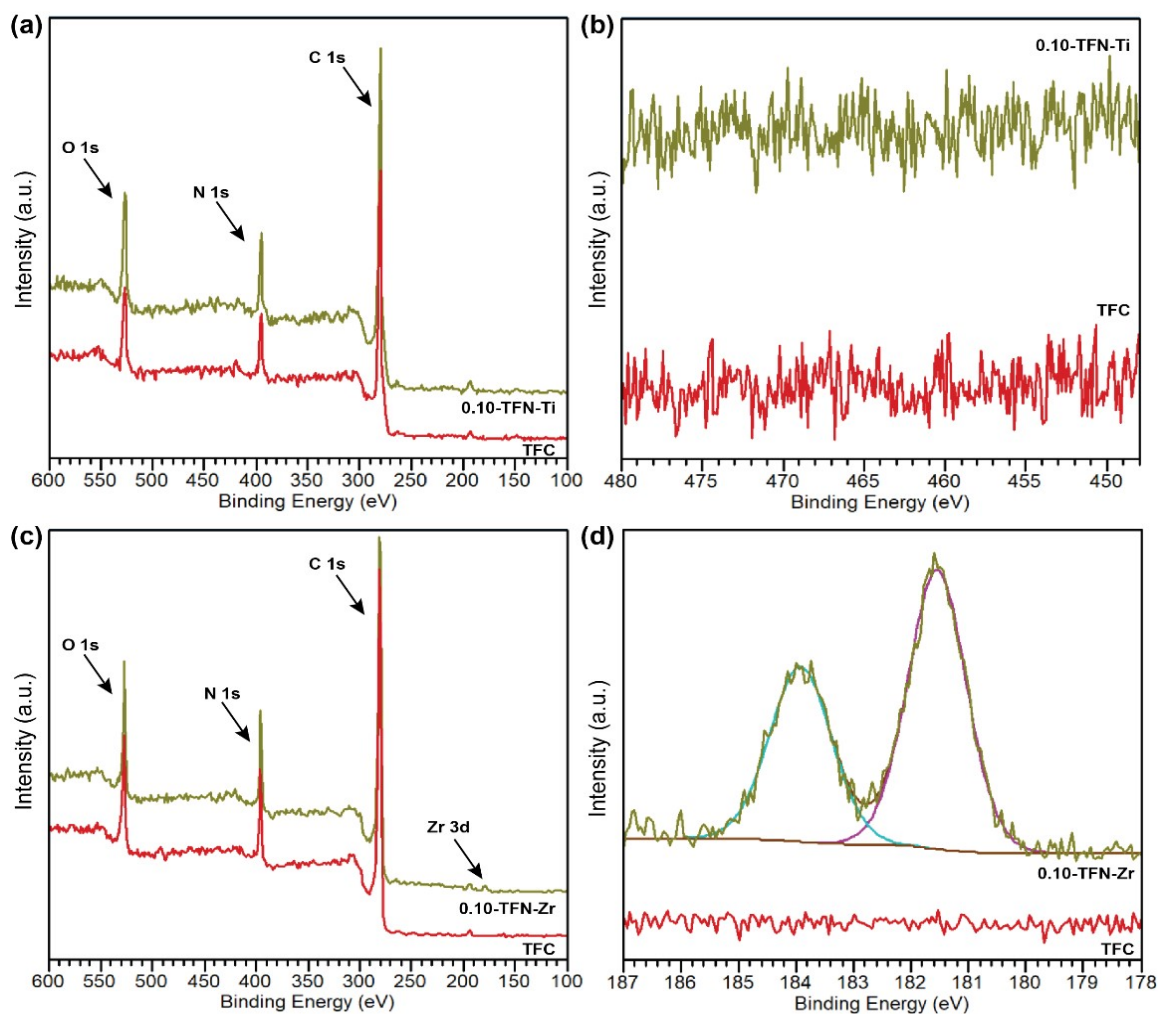

**Supplementary Figure S4.** XPS spectra of survey (a) and Ti 2p region (b) of TFC and 0.10-TFN-Ti membranes, and survey (c) and Zr 3d region (d) of TFC and 0.10-TFN-Zr membranes.

**Note:** TFN-Zr membranes with two peaks located at 181.5 eV and 184 eV, corresponding to Zr 3d<sub>5/2</sub> and Zr 3d<sub>3/2</sub>, respectively.<sup>8</sup>

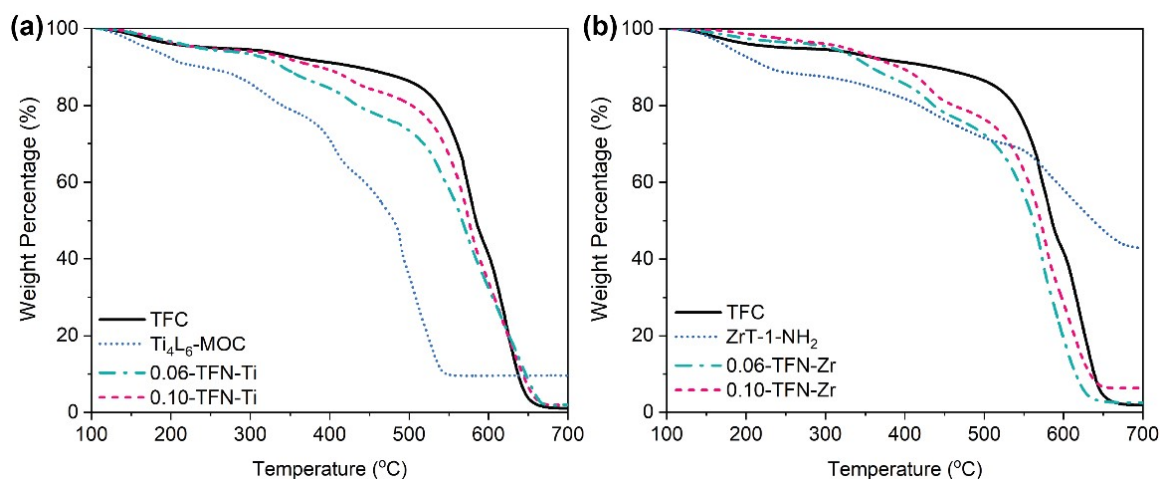

**Supplementary Figure S5.** TGA curves of TFN-Ti (a) and TFN-Zr (b) membranes.

**Note:** During TGA, the PA layers of TFN-Zr membranes were burned in air until 700 °C, and their residual zirconium oxide masses represent the amount of Zr originally contained in the PA layer. After correcting with the residual mass of pure ZrT-1-NH<sub>2</sub> powder, 0.06-TFN-Zr and 0.10-TFN-Zr contain 2.19 wt% and 9.96 wt%, respectively. It is apparent that the higher initial ZrT-1-NH<sub>2</sub> loading results in membrane with higher ZrT-1-NH<sub>2</sub> content. The content of ZrT-1-NH<sub>2</sub> in 0.10-TFN-Zr is even higher than the theoretical concentration of 4.76 wt%. This may be due to the deposition of heavier large ZrT-1-NH<sub>2</sub> aggregates on the membrane during fabrication. Therefore, although the reason for the constant Zr content on the membrane surface is not clearly known, it is possible, however, that the excess MOC is deposited deeper in the membrane. This saturation may have an adverse effect on the membrane performance where the formation of larger cage aggregates either form an unfavorable interface with the PA<sup>9</sup> or increase mass transport resistance.<sup>10</sup> This decrease in permeability due to higher cage loading was also observed in membranes containing other MOCs and POCs.<sup>11</sup>

On the other hand, 0.06-TFN-Ti and 0.10-TFN-Ti membranes contain 1.87 wt% and 1.82 wt% of Ti<sub>4</sub>L<sub>6</sub>-MOC, respectively, which are lower than the TFN-Zr. This corroborates that crosslinking of MOC to the polymeric matrices enhances MOC loading. The presence of TiO<sub>2</sub> in the TGA residue confirms that Ti<sub>4</sub>L<sub>6</sub>-MOC is present inside the polyamide layer, perhaps deeper into the polyamide matrix than on the surface since XPS was unable to detect its presence.

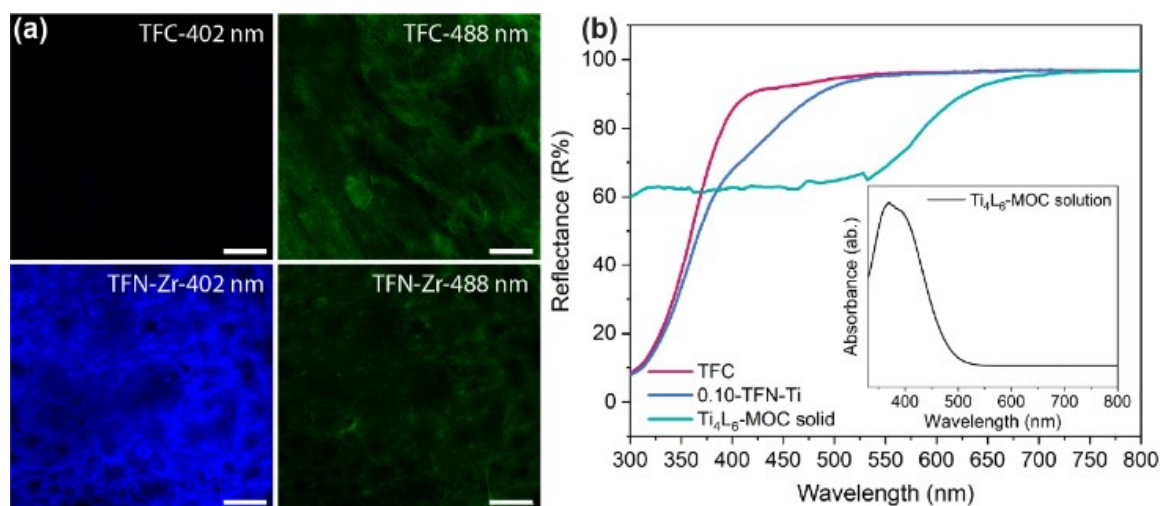

**Supplementary Fig. S6.** (a) Confocal laser spectroscopy of TFC and 0.10-TFN-Zr membrane at UV (Ex. 402 nm) and FITC (Ex. 488 nm) regions. The scale bar represents 100  $\mu$ m. (b) UV-vis spectrum of solid Ti<sub>4</sub>L<sub>6</sub>-MOC, TFC, 0.10-TFN-Ti membrane and Ti<sub>4</sub>L<sub>6</sub>-MOC solution (insert).

**Note:** ZrT-1-NH<sub>2</sub> emits blue fluorescence under ultraviolet radiation when fully dissolved.<sup>3</sup> Therefore, the presence of blue fluorescence in the TFN-Zr membrane is a key indicator of well-dispersed ZrT-1-NH<sub>2</sub> in the PA layer. The intensity of the laser was set to be the same for both TFC and TFN-Zr. The difference between TFC-488 nm and TFN-Zr-488 nm is probably due to the lesser MPD-TMC linkage that gave weaker green fluorescence at 488 nm.

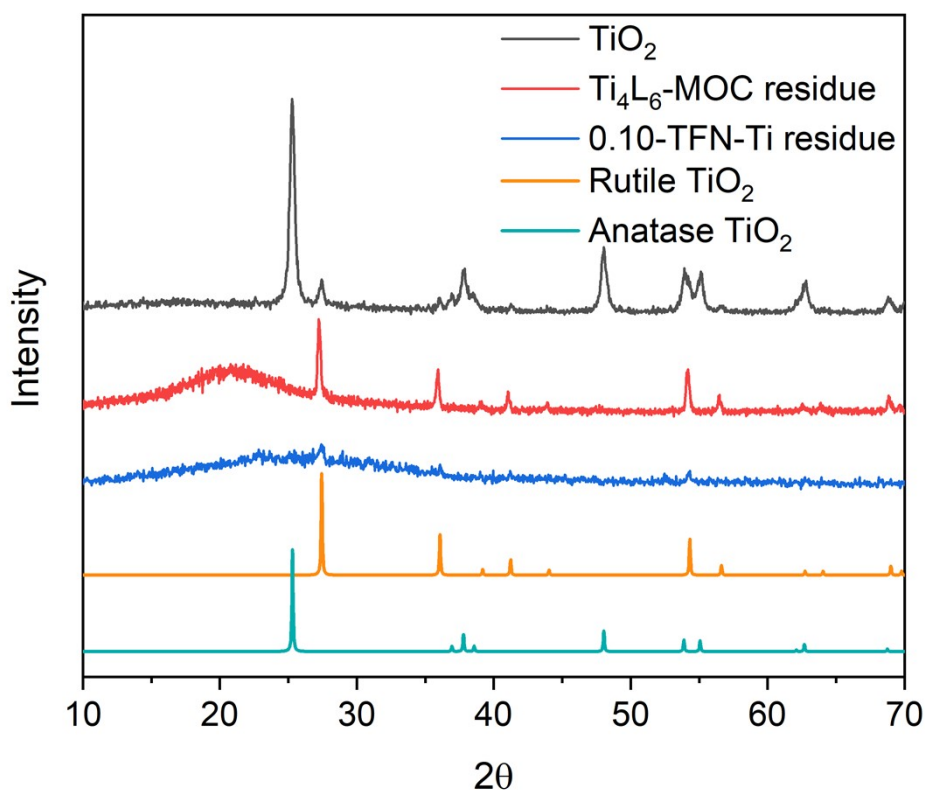

**Supplementary Figure S7.** PXRD patterns of the residual  $\text{TiO}_2$  from TGA analysis. The white titanium oxide residue obtained from burning  $\text{Ti}_4\text{L}_6$ -MOC dispersed in the TFN-Ti had very weak crystallinity, with only peaks at  $27.4^\circ$  (110) and  $54.3^\circ$  (211) barely distinguishable but still matched to the patterns of commercial  $\text{TiO}_2$  and residues found from  $\text{Ti}_4\text{L}_6$ -MOC crystals directly burned in air during TGA. The weak and amorphous peaks indicate that the residual  $\text{TiO}_2$  exists as nanoparticles as compared to the micropowder residues,<sup>12</sup> which suggests that  $\text{Ti}_4\text{L}_6$ -MOC was well-dispersed inside the PA layer.

**Note:**  $\text{TiO}_2$  (Aeroxide, P25) is a mixture of rutile<sup>13</sup> and anatase<sup>14</sup> phases. The  $\text{Ti}_4\text{L}_6$ -MOC and 0.10-TFN-Ti membrane TGA residues essentially display the rutile phase due to the high temperature of TGA that induced the transformation of anatase to the more stable rutile phase.<sup>15</sup>



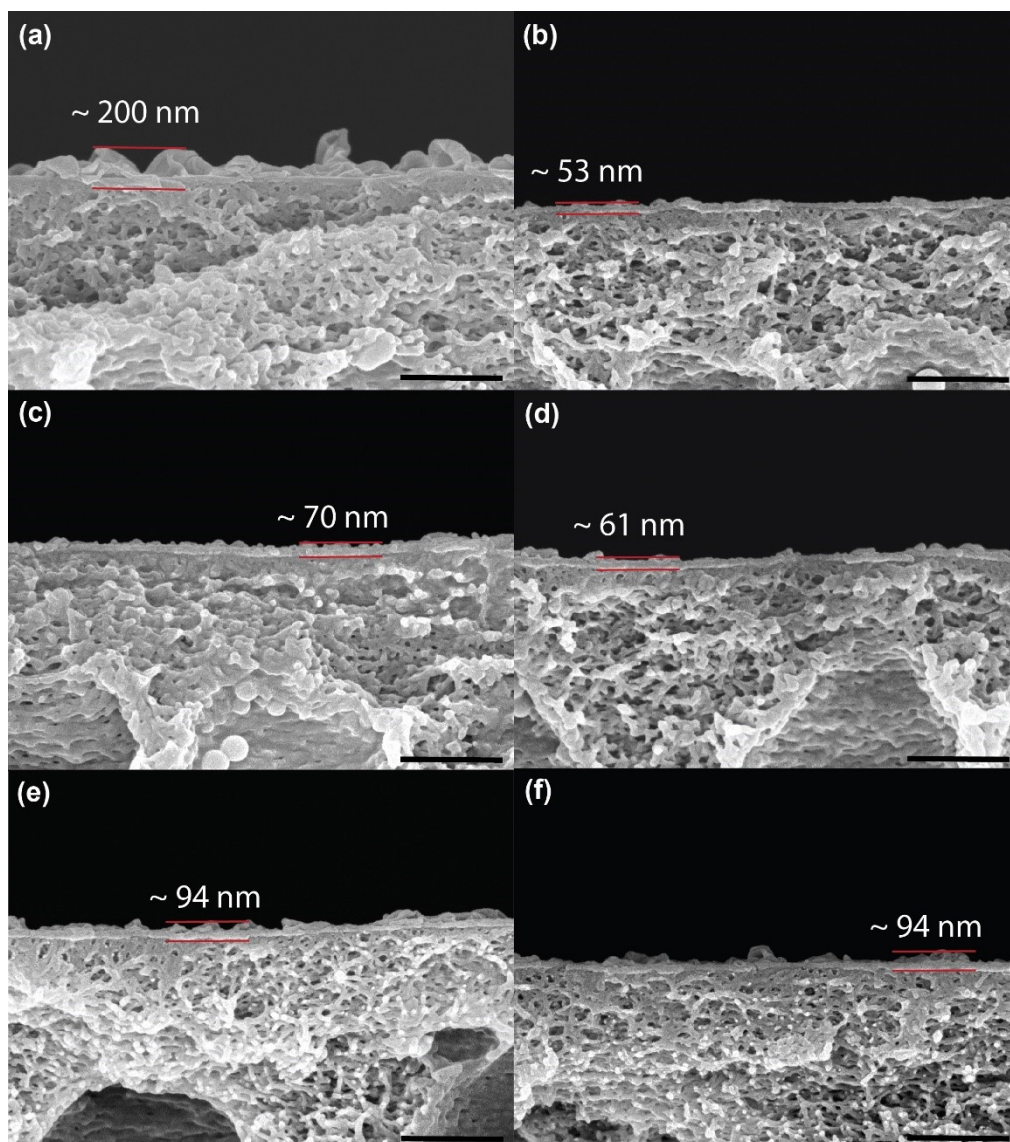

**Supplementary Fig. S8.** Cross-sectional FESEM image of (a) TFC, (b) 0.02-TFN-Zr, (c) 0.04-TFN-Zr, (d) 0.06-TFN-Zr, (e) 0.08-TFN-Zr, (f) 0.10-TFN-Zr. The scale bars represent 500 nm.

**Note:** TFC membrane has a relatively thick layer of polyamide membrane consisting of large leaflets. With the addition of a minute amount of ZrT-1-NH<sub>2</sub>, the polyamide layer became thin, and large folds were absent. The thickening of the membrane beyond 0.04-TFN-Zr may have resulted in the lower membrane permeability.



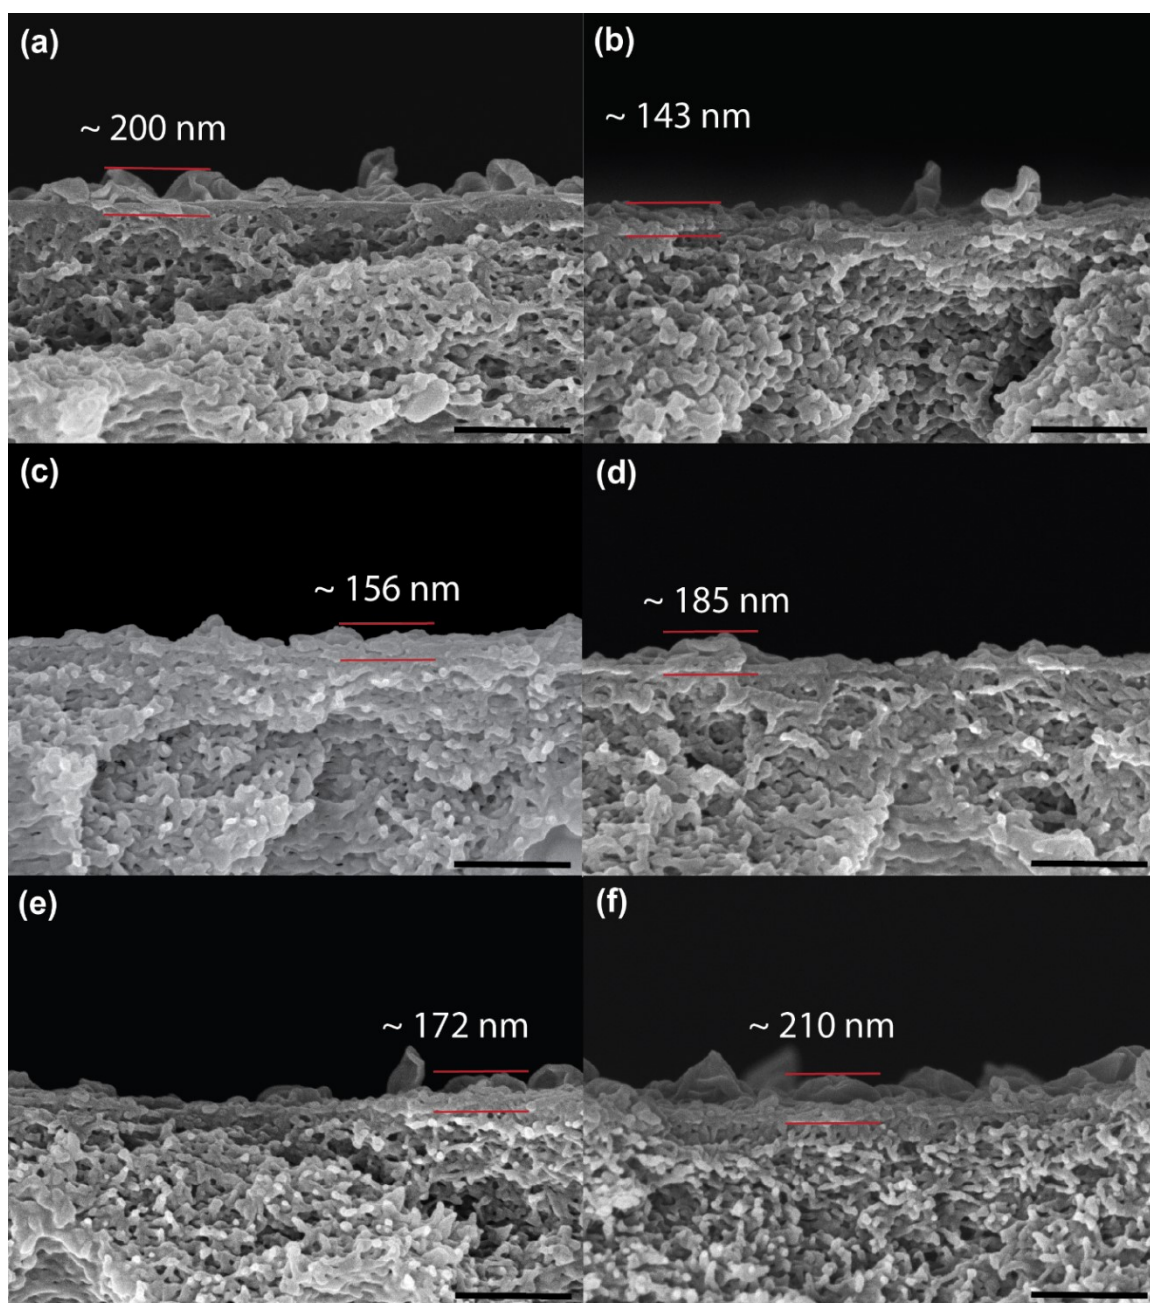

**Supplementary Fig. S9.** Cross-sectional FESEM image of (a) TFC, (b) 0.02-TFN-Ti, (c) 0.04-TFN-Ti, (d) 0.06-TFN-Ti, (e) 0.08-TFN-Ti, (f) 0.10-TFN-Ti. The scale bars represent 500 nm.

**Note:** The distinct leaflets of TFC polyamide layer disappeared when  $\text{Ti}_4\text{L}_6\text{-MOC}$  was added. Compared to TFN-Zr, TFN-Ti membranes are relatively thick but flatter compared to TFC due to the collapse of the leaflets. As the concentration of  $\text{Ti}_4\text{L}_6\text{-MOC}$  during membrane fabrication increases, large folds are again seen in higher concentration membranes such as 0.08-TFN-Ti and 0.10-TFN-Ti.

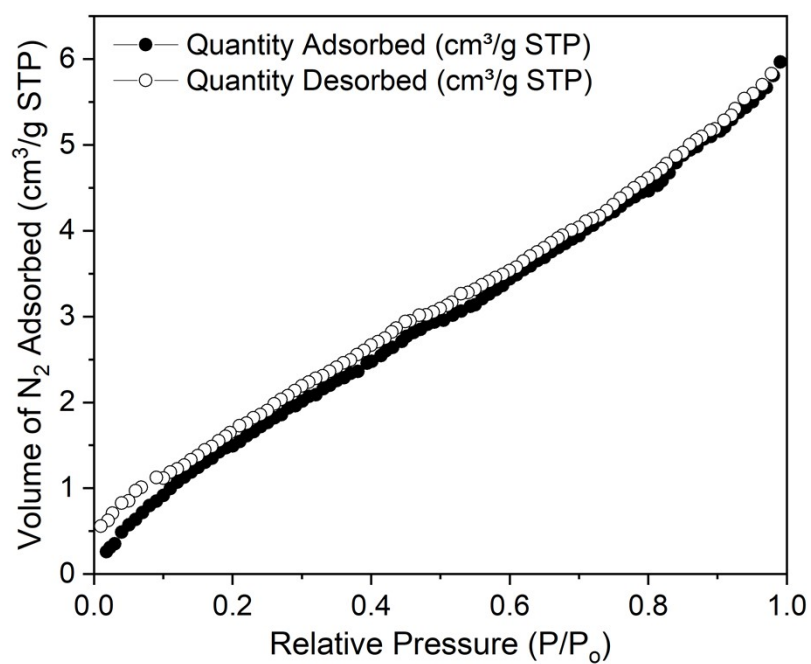

**Supplementary Fig. S10.**  $\text{N}_2$  sorption on  $\text{Ti}_4\text{L}_6\text{-MOC}$  at 77 K.

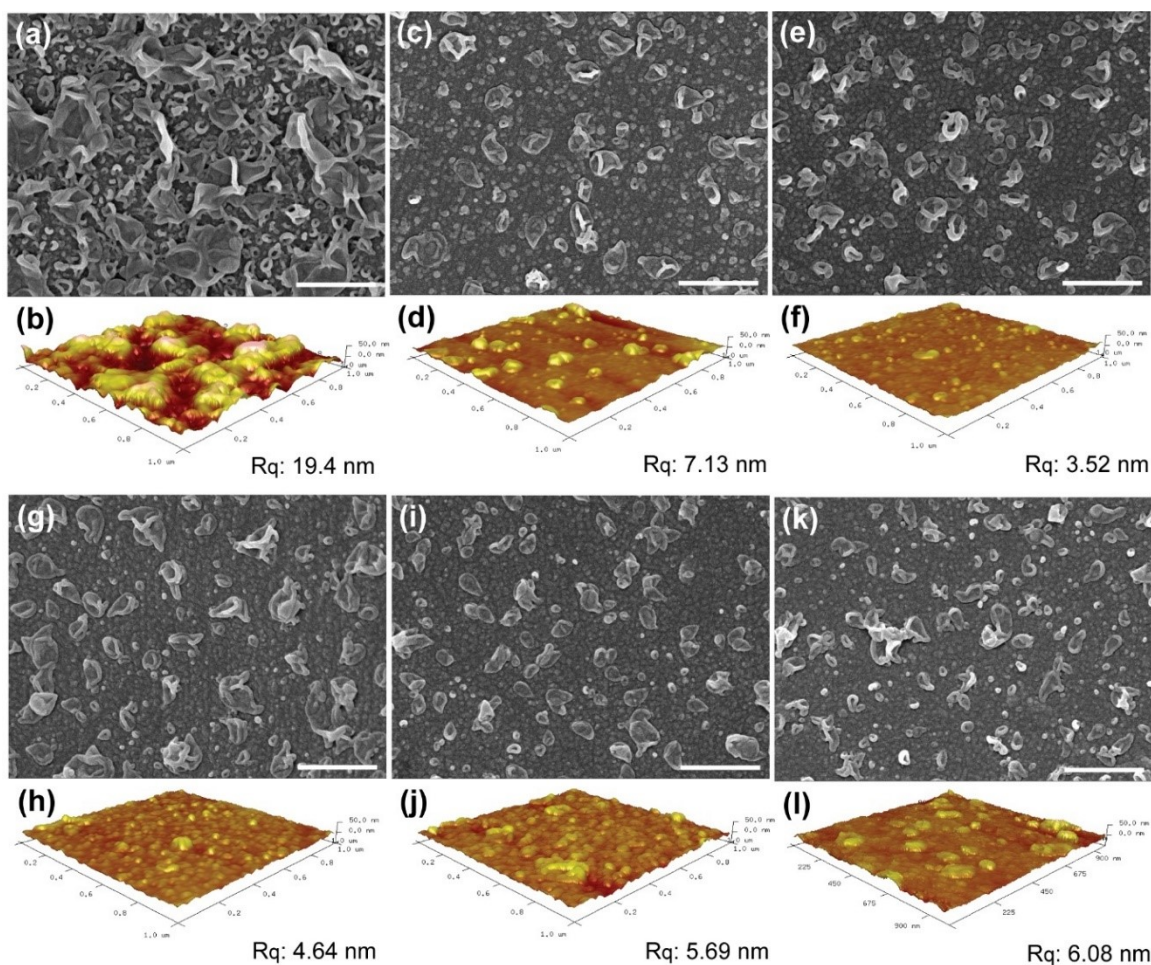

**Supplementary Fig. S11.** Surface morphologies of TFN-Zr membranes. SEM and AFM images of TFC (a, b), 0.02-TFN-Zr (c, d), 0.04-TFN-Zr (e, f), 0.06-TFN-Zr (g, h), 0.08-TFN-Zr (i, j), 0.10-TFN-Zr (k, l). The scale bars represent 500 nm.

**Note:** With the addition of ZrT-1-NH<sub>2</sub> into the polyamide layer, the selective layer morphology changed. The heavy ridges and leaflets characteristic of the TFC membrane was replaced by nodules and miniature leaflets when a minute amount of ZrT-1-NH<sub>2</sub> (0.02-TFN-Zr) was added, which resulted in a much smoother membrane surface. Further increase in the concentration during polyamide fabrication did not significantly affect the membrane surface morphology. This suggests that a very low concentration is sufficient to affect the polyamide morphology by participating in the polymeric matrix. Saturation is quickly reached such that higher concentration will no longer affect the membrane morphology.



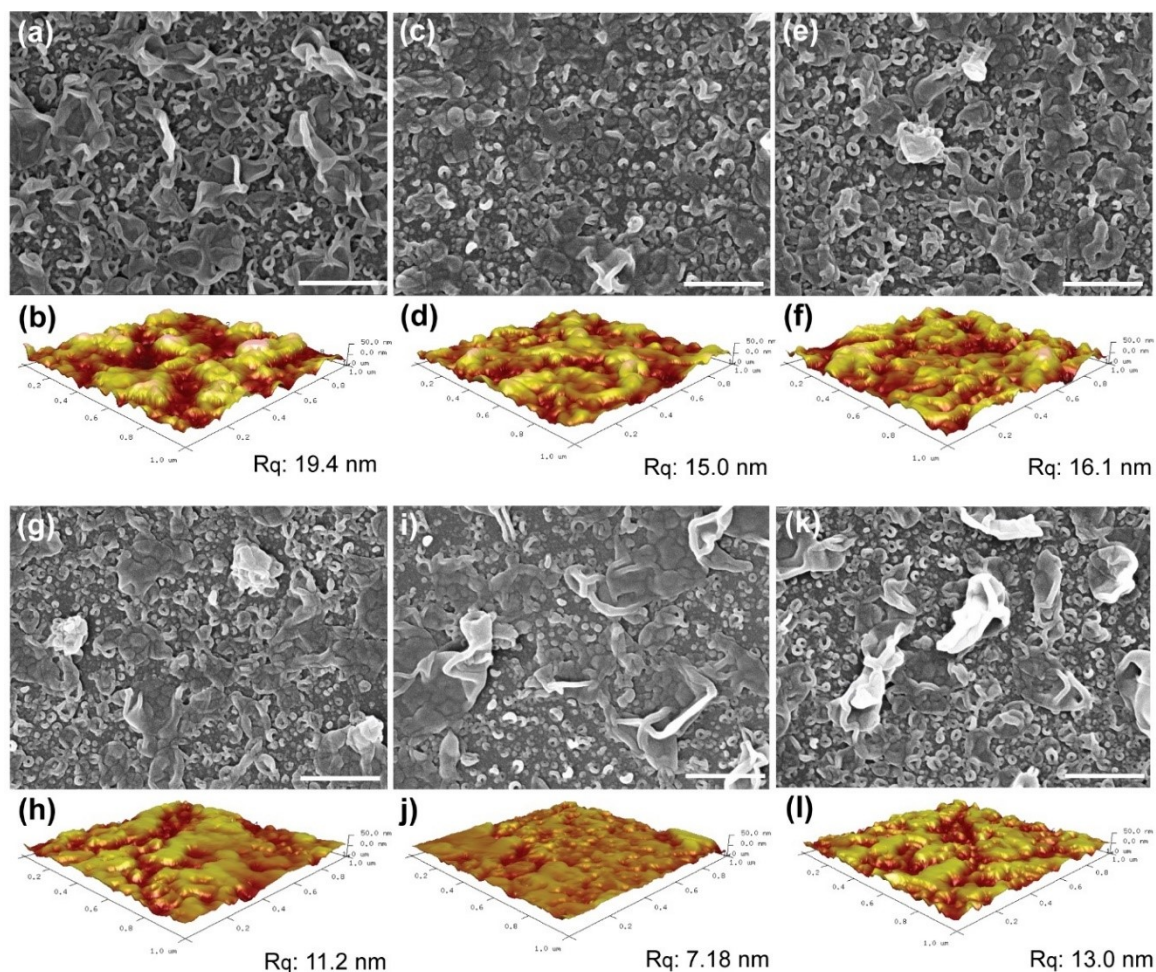

**Supplementary Fig. S12.** Surface morphologies of TFN-Ti membranes. SEM and AFM images of TFC (a, b), 0.02-TFN-Ti (c, d), 0.04-TFN-Ti (e, f), 0.06-TFN-Ti (g, h), 0.08-TFN-Ti (i, j), 0.10-TFN-Ti (k, l). The scale bars represent 500 nm.

**Note:** Unlike TFN-Zr membranes, the heavy ridges and leaflets persist in TFN-Ti membranes, but the leaflets seem to collapse on top of the ridges to form smooth areas. Higher concentrations of  $\text{Ti}_4\text{L}_6\text{-MOC}$  encouraged the formation of larger leaflets. The leaflets on 0.10-TFN-Ti were large enough to form thick folds that introduced more surface roughness.

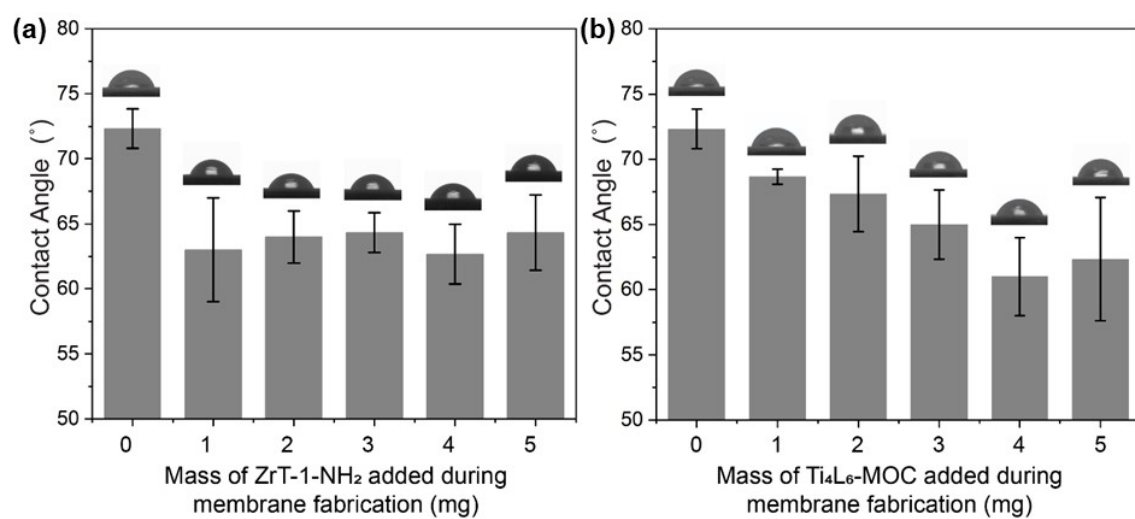

**Supplementary Fig. S13.** Contact angles of TFN-Zr (a) and TFN-Ti (b) membranes.

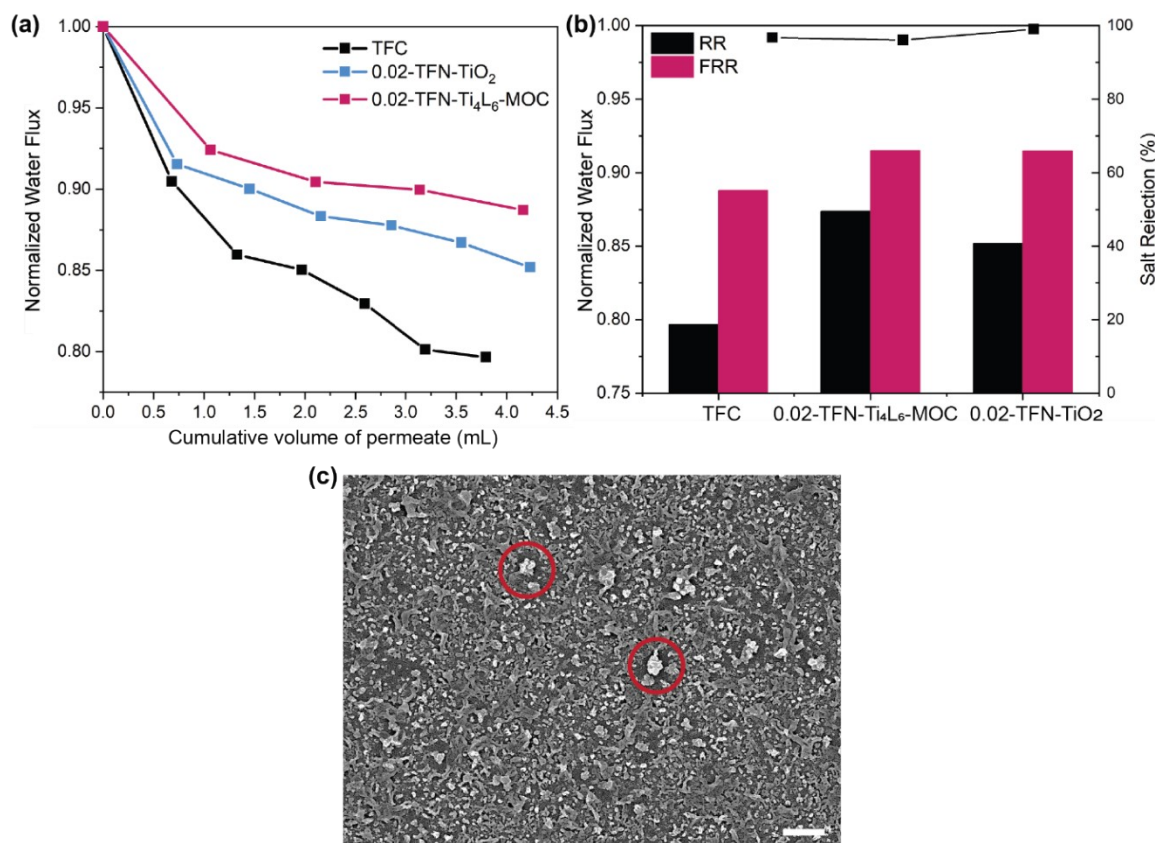

**Supplementary Fig. S14.** Antifouling study of TiO<sub>2</sub> compared to Ti<sub>4</sub>L<sub>6</sub>-MOC. (a) Dynamic BSA fouling of TFC, 0.02-TFN-Ti<sub>4</sub>L<sub>6</sub>-MOC, and 0.02-TFN-TiO<sub>2</sub>. (b) Retention ratio (RR) and flux recovery ratio (FRR) of TFC, 0.02-TFN-Ti<sub>4</sub>L<sub>6</sub>-MOC, and 0.02-TFN-TiO<sub>2</sub> after BSA fouling and washing with DI water. (c) FESEM image of 0.02-TFN-TiO<sub>2</sub> with aggregates of TiO<sub>2</sub> circled in red. The scale bar represents 1  $\mu$ m.

**Note:** Due to the stability of the MOCs, there should not be free metal ions in the membrane system. Assuming the Ti<sub>4</sub>L<sub>6</sub>-MOC dissociates in water or contains free metal ions, the TiCl<sub>4</sub> will react with water to form TiO<sub>2</sub>. Hence, we compared Ti<sub>4</sub>L<sub>6</sub>-MOC with TiO<sub>2</sub>. A dynamic BSA fouling test was conducted for membranes containing Ti<sub>4</sub>L<sub>6</sub>-MOC (0.02-TFN-Ti<sub>4</sub>L<sub>6</sub>-MOC) and TiO<sub>2</sub> (0.02-TFN-TiO<sub>2</sub>). Within the testing period, the presence of TiO<sub>2</sub> and Ti<sub>4</sub>L<sub>6</sub>-MOC offered better antifouling capability. 0.02-TFN-Ti<sub>4</sub>L<sub>6</sub>-MOC appeared to foul less compared to 0.02-TFN-TiO<sub>2</sub>. This may be attributed to the presence of Ti<sup>3+</sup> in Ti<sub>4</sub>L<sub>6</sub>-MOC. Therefore, the entire Ti<sub>4</sub>L<sub>6</sub>-MOC structure, instead of its metal ions, contributed to the enhancement of the membrane's antifouling property. The 0.02-TFN-TiO<sub>2</sub> membrane retained the characteristic ridges and leaflets of TFC with some large TiO<sub>2</sub> aggregates dispersed on the membrane surface. Hence, membrane hydrophilicity may play a greater role than membrane morphology in the antifouling capability of 0.02-TFN-TiO<sub>2</sub> membrane.

**Table S1.** The effect of acetone on membrane performance.

| Membrane                   | Water Flux (LMH)    | Salt Rejection (%)  |
|----------------------------|---------------------|---------------------|
| <b>TFC</b>                 | 6.98 ( $\pm$ 0.37)  | 95.22 ( $\pm$ 0.73) |
| <b>TFC-without acetone</b> | 14.88 ( $\pm$ 0.33) | 95.74 ( $\pm$ 0.13) |
| <b>0.04-TFN-Zr</b>         | 24.32 ( $\pm$ 0.43) | 96.49 ( $\pm$ 0.81) |

Membranes tested at 15.5 bar, 2000 ppm NaCl condition. All data is an average of replicates of three.

**Note:** Acetone adversely affects the membrane performance, specifically the membrane water flux. However, acetone is currently required for the dissolution and incorporation of ZrT-1-NH<sub>2</sub> in the polyamide layer. The benefit of selective transport of water through ZrT-1-NH<sub>2</sub> justifies the addition of acetone.

**Table S2.** XPS atomic percentage of TFN-Zr membranes.

| Sample             | C (%)              | O (%)              | N (%)              | Zr (%)               | O/N                  |
|--------------------|--------------------|--------------------|--------------------|----------------------|----------------------|
| <b>TFC</b>         | 78.3 ( $\pm$ 2.2)  | 10.4 ( $\pm$ 1.8)  | 11.3 ( $\pm$ 0.65) | -                    | 0.935 ( $\pm$ 0.163) |
| <b>0.02-TFN-Zr</b> | 78.3 ( $\pm$ 1.5)  | 10.4 ( $\pm$ 1.4)  | 11.1 ( $\pm$ 0.60) | 0.233 ( $\pm$ 0.043) | 0.976 ( $\pm$ 0.155) |
| <b>0.04-TFN-Zr</b> | 77.6 ( $\pm$ 0.74) | 10.4 ( $\pm$ 0.76) | 11.8 ( $\pm$ 0.77) | 0.223 ( $\pm$ 0.049) | 0.916 ( $\pm$ 0.086) |
| <b>0.06-TFN-Zr</b> | 78.2 ( $\pm$ 0.75) | 9.99 ( $\pm$ 1.1)  | 11.6 ( $\pm$ 0.82) | 0.225 ( $\pm$ 0.029) | 0.908 ( $\pm$ 0.140) |
| <b>0.08-TFN-Zr</b> | 78.6 ( $\pm$ 1.3)  | 9.36 ( $\pm$ 0.88) | 11.8 ( $\pm$ 0.80) | 0.203 ( $\pm$ 0.050) | 0.847 ( $\pm$ 0.145) |
| <b>0.10-TFN-Zr</b> | 79.0 ( $\pm$ 0.94) | 9.59 ( $\pm$ 0.74) | 11.2 ( $\pm$ 1.3)  | 0.225 ( $\pm$ 0.044) | 0.789 ( $\pm$ 0.225) |

**Note:** The atomic percentage of surface Zr on various TFN-Zr membranes remained relatively constant irrespective of the initial loading concentration and the total ZrT-1-NH<sub>2</sub> content in the PA layer, as determined by TGA.



**Table S3.** XPS atomic percentage of TFN-Ti membranes.

| Sample             | C (%) | O (%) | N (%) | Ti (%) | O/N   |
|--------------------|-------|-------|-------|--------|-------|
| <b>TFC</b>         | 80.37 | 9.45  | 10.19 | -      | 0.927 |
| <b>0.02-TFN-Ti</b> | 78.56 | 11.45 | 11.99 | -      | 0.955 |
| <b>0.04-TFN-Ti</b> | 77.8  | 10.49 | 11.72 | -      | 0.895 |
| <b>0.06-TFN-Ti</b> | 80.09 | 9.37  | 10.54 | -      | 0.889 |
| <b>0.08-TFN-Ti</b> | 76.57 | 11.07 | 12.36 | -      | 0.896 |
| <b>0.10-TFN-Ti</b> | 78.54 | 10.24 | 11.22 | -      | 0.913 |

**Note:** The presence of Ti was not detected.

## Reference

1. G. Liu, Z. Yang, M. Zhou, Y. Wang, D. Yuan and D. Zhao, *Chem. Commun.*, 2021, **57**, 6276–6279.
2. Y.-P. He, L.-B. Yuan, G.-H. Chen, Q.-P. Lin, F. Wang, L. Zhang and J. Zhang, *J. Am. Chem. Soc.*, 2017, **139**, 16845–16851.
3. G. Liu, X. Zhang, Y. D. Yuan, H. Yuan, N. Li, Y. Ying, S. B. Peh, Y. Wang, Y. Cheng, Y. Cai, Z. Gu, H. Cai and D. Zhao, *ACS Mater. Lett.*, 2021, **3**, 268–274.
4. Z. Yang, G. Liu, Y. D. Yuan, S. B. Peh, Y. Ying, W. Fan, X. Yu, H. Yang, Z. Wu and D. Zhao, *J. Membr. Sci.*, 2021, 119564.
5. K. Listiarini, W. Chun, D. D. Sun and J. O. Leckie, *J. Membr. Sci.*, 2009, **344**, 244–251.
6. A. S. Kim and E. M. V. Hoek, *Environ. Eng. Sci.*, 2002, **19**, 373–386.
7. Y. Bessiere, N. Abidine and P. Bacchin, *J. Membr. Sci.*, 2005, **264**, 37–47.
8. M. Sun, Q.-Q. Wang, C. Qin, C.-Y. Sun, X.-L. Wang and Z.-M. Su, *Chem. Eur. J.*, 2019, **25**, 2824–2830.
9. R. Han and P. Wu, *ACS Appl. Mater. Interfaces*, 2018, **10**, 18351–18358.
10. L. Liu, X. Xie, S. Qi, R. Li, X. Zhang, X. Song and C. Gao, *J. Membr. Sci.*, 2019, **580**, 101–109.
11. G. Zhu, F. Zhang, M. P. Rivera, X. Hu, G. Zhang, C. W. Jones and R. P. Lively, *Angew. Chem. Int. Ed.*, 2018, **58**, 2638–2643.
12. X. Cao, J. Ma, X. Shi and Z. Ren, *Appl. Surf. Sci.*, 2006, **253**, 2003–2010.
13. P. Villar, PAULING FILE in: Inorganic Solid Phases. TiO<sub>2</sub> rutile (TiO<sub>2</sub> rut) Crystal Structure. *SpringerMaterials (online database)*, Springer, Heidelberg (ed.), 2016.
14. C. J. Howard, T. M. Sabine and F. Dickson, *Acta Crystallogra. B*, 1991, **47**, 462–468.
15. D. A. H. Hanaor and C. C. Sorrell, *J. Mater. Sci.*, 2011, **46**, 855–874.
